# Supplementary material for: A Multi-Omics Approach to Defining Target Organ Injury in Youth with Primary Hypertension
Source: PubMed Central journal article supplement — bioRxiv. 2024 Jun 18:2024.06.17.599125. Preprint. [Version 1] doi: 10.1101/2024.06.17.599125 (PMC11212900; doi:10.1101/2024.06.17.599125), 2024-06-18
Supplement: NIHPP2024.06.17.599125v1-supplement-9.pdf [file NIHPP2024.06.17.599125v1-supplement-9.pdf]

## Online Supplemental Figures 1-2

### A Multi-Omics Approach to Defining Target Organ Injury in Youth with Primary Hypertension

Kalyani Ananthamohan, PhD<sup>1#</sup>, Tammy M. Brady, MD, PhD<sup>2\*</sup>, Mohammed Arif, PhD<sup>1</sup>, Stephen Daniels, MD, PhD<sup>3</sup>, Bonita Falkner, MD<sup>4</sup>, Michael Ferguson, MD<sup>5</sup>, Joseph T. Flynn, MD, MS<sup>6</sup>, Coral Hanevold, MD<sup>6</sup>, Stephen R. Hooper, PhD<sup>7</sup>, Julie Ingelfinger, MD<sup>8</sup>, Marc Lande, MD, MPh<sup>9</sup>, Lisa J. Martin, PhD<sup>10</sup>, Kevin E. Meyers, MD<sup>11</sup>, Mark Mitsnefes, MD, MS<sup>12</sup>, Bernard Rosner, PhD<sup>13</sup>, Joshua A. Samuels, MD, MPH<sup>14</sup>, Gina Kuffel, MS<sup>15</sup>, Michael J. Zilliox, PhD<sup>15</sup>, Richard C. Becker, MD, Med<sup>1</sup>, Elaine M. Urbina, MD, MS<sup>16</sup> and Sakthivel Sadayappan, PhD, MBA<sup>1#</sup>

#### Affiliations and addresses

1. Department of Internal Medicine, Division of Cardiovascular Health and Diseases, Center for Cardiovascular Research, University of Cincinnati College of Medicine, Cincinnati, OH.
2. Division of Pediatric Nephrology, Johns Hopkins University, Baltimore, MD.
3. Department of Pediatrics, Denver Children's Hospital, Aurora, CO.
4. Departments of Medicine and Pediatrics, Thomas Jefferson University, Philadelphia, PA.
5. Division of Nephrology, Boston Children's Hospital, Boston, MA.
6. Department of Pediatrics, University of Washington School of Medicine, Division of Nephrology, Seattle Children's Hospital, Seattle, WA.
7. School of Medicine, Department of Health Sciences, University of North Carolina at Chapel Hill, Chapel Hill, NC.
8. Department of Pediatrics, Harvard Medical School, Mass General Hospital for Children at Massachusetts General Brigham, Boston, MA.
9. Department of Pediatrics, University of Rochester Medical Center, Rochester, NY.
10. Division of Human Genetics, Cincinnati Children's Hospital Medical Center, Department of Pediatrics, University of Cincinnati College of Medicine, Cincinnati, OH.
11. Division of Nephrology and Hypertension, Children's Hospital of Philadelphia, Philadelphia, PA.
12. Division of Nephrology and Hypertension, Cincinnati Children's Hospital Medical Center, Department of Pediatrics, University of Cincinnati College of Medicine, Cincinnati, OH.
13. Channing Division of Network Medicine, Harvard University, Cambridge, MA.
14. Pediatric Nephrology & Hypertension, McGovern Medical School, University of Texas, Houston, TX.
15. Department of Public Health Sciences, Loyola University Chicago, Maywood, IL.
16. Division of Cardiology, Heart Institute, Cincinnati Children's Hospital Medical Center, Department of Pediatrics, University of Cincinnati College of Medicine, Cincinnati, OH.

\*Contributed equally

Short Title: VASH1 in TOI

#Co-correspondence: Kalyani Ananthamohan, PhD, Center for Cardiovascular Research, Division of Cardiovascular Health and Disease, Department of Internal Medicine, University of Cincinnati College of Medicine, Cincinnati, OH 45267. Phone: 513-558-7442; Email: [ananthka@ucmail.uc.edu](mailto:ananthka@ucmail.uc.edu)

# Co-correspondence: Sakthivel Sadayappan, PhD, MBA, Center for Cardiovascular Research, Division of Cardiovascular Health and Disease, Department of Internal Medicine, University of Cincinnati College of Medicine, Cincinnati, OH 45267. Phone: 513-558-7498; Email: [sadayasl@ucmail.uc.edu](mailto:sadayasl@ucmail.uc.edu)

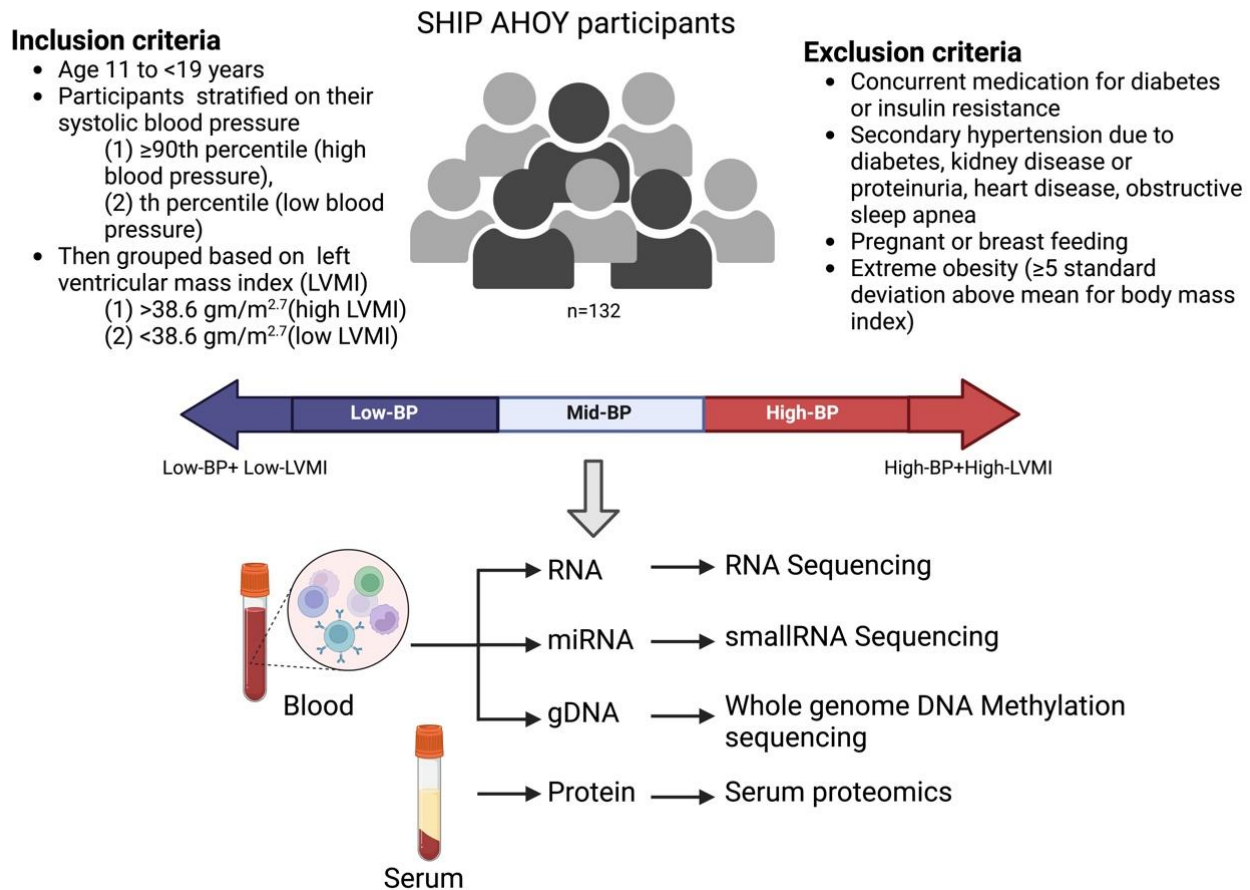

**Supplemental Figure S1. Human study experimental approach.** This schematic depicts the methodology and study approach in the present study. We examined a SHIP AHOY cohort of youths with the indicated inclusion and exclusion criteria. The study participants were stratified based on their blood pressure and 132 adolescents (mean age ~15 years, male-57.58%) were included for this cross-sectional study (Table 1, Methods section) and grouped based on their left ventricular mass index (Table 2, Methods section). Blood and serum samples collected from the participants were utilized to isolate total RNA, miRNA, genomic DNA and protein samples that were later utilized to perform RNA sequencing, miRNA sequencing, whole-genome DNA methylation sequencing and serum proteomics analyses. The sequencing and proteomics data were further analyzed and correlated to identify the candidate genes and pathways involved in the early cardiovascular target organ injury (Figure Created with BioRender.com). **gDNA**: genomic DNA, **miRNA**: microRNA.

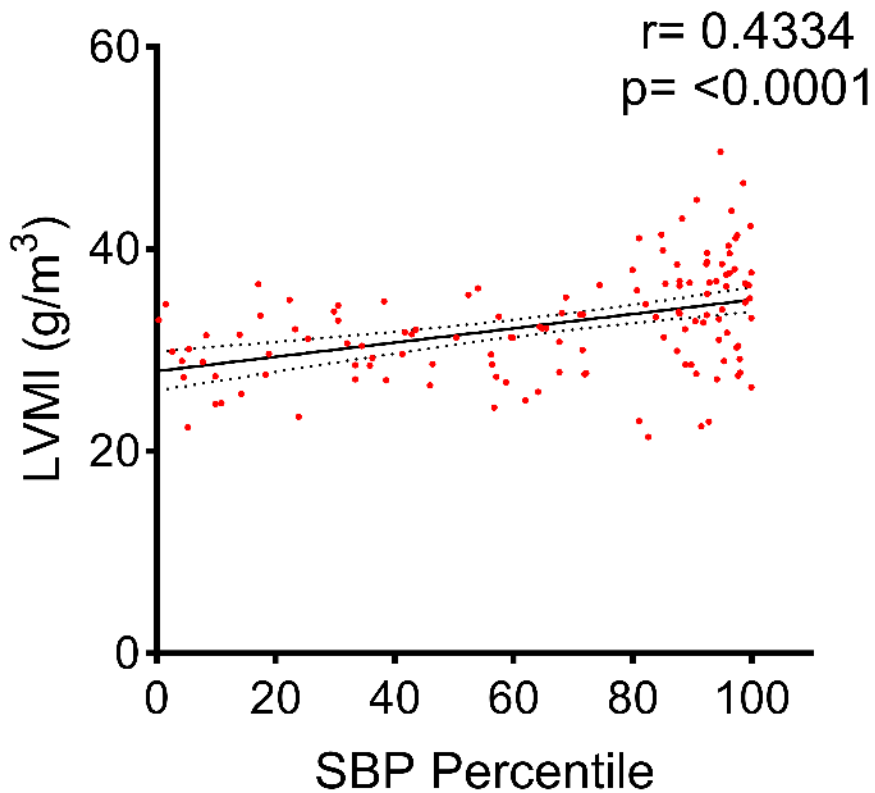

**Supplemental Figure S2. Correlation of LVMI with systolic blood pressure percentile in adolescents of SHIP AHOY participants.** Each data point represents an individual participant's SBP Percentile values against their LVMI (n=132). The Spearman correlation coefficient and its significant value are 0.4334 and  $p < 0.0001$  respectively, indicating a significant positive correlation between SBP percentile and LVMI.

LVMI: Left Ventricular Mass Index; SBP: systolic blood pressure.
